# Supplementary material for: Pectic Bee Pollen Polysaccharide from Rosa rugosa Alleviates Diet-Induced Hepatic Steatosis and Insulin Resistance via Induction of AMPK/mTOR-Mediated Autophagy
Source: PubMed Central journal article supplement (PMC6154703; doi:10.3390/molecules22050699), 2017-04-28
Supplement: molecules-22-00699-s001.pdf [file molecules-22-00699-s001.pdf]

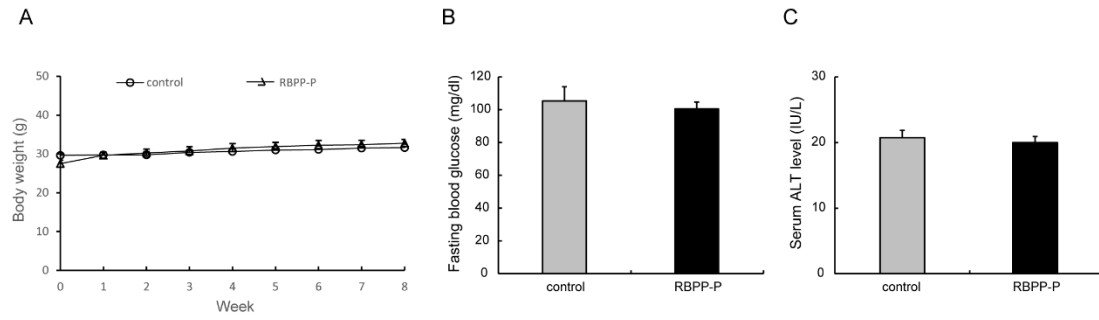

**Figure S1.** Effects of RBPP-P on the physiological activities of mice. Mice were treated with RBPP-P (20 mg/kg, intraperitoneal injection, once daily) for 8 weeks. **(A)** Effect of RBPP-P on body weight; **(B)** Effect of RBPP-P on fasting blood glucose; **(C)** Effect of RBPP-P on serum alanine transaminase (ALT) level. Results represent mean  $\pm$  s.d. ( $n = 6$  mice in each group).

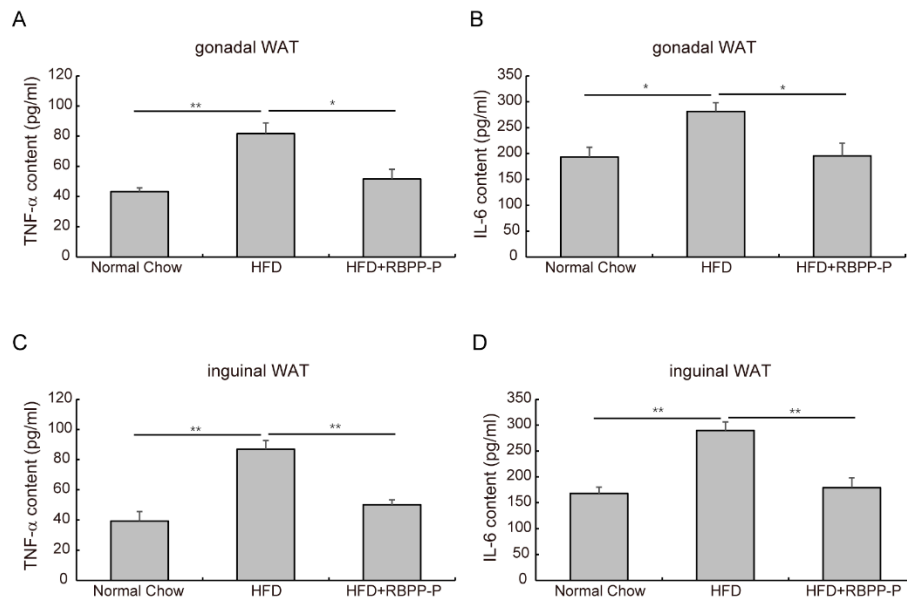

**Figure S2.** Effects of RBPP-P on contents of cytokines in adipose tissues. HFD-fed mice were treated with RBPP-P (20 mg/kg, intraperitoneal injection, once daily) for 8 weeks. **(A)** Tumor necrosis factor  $\alpha$  (TNF- $\alpha$ ) content in gonadal WAT (white adipose tissue). **(B)** Interleukin 6 (IL-6) content in gonadal WAT. **(C)** TNF- $\alpha$  content in inguinal WAT. **(D)** IL-6 content in inguinal WAT. Results represent mean  $\pm$  s.d. ( $n = 8$  mice in each group). \*  $p < 0.05$ ; \*\*  $p < 0.01$ .

**Table S1.** Primer sequences for qPCR.

| Genes         | Forward                        | Reverse                        |
|---------------|--------------------------------|--------------------------------|
| <i>Ppara</i>  | 5'-CTTCAACATGAACAAGGTCAAAGC-3' | 5'-AGCCATACACAGTGTCTCCATATC-3' |
| <i>Cpt1a</i>  | 5'-CTCAGTGGGAGCGACTCTTCA-3'    | 5'-GGCCTCTGTGGTACACGACAA-3'    |
| <i>Acox1</i>  | 5'-CAGCCAGATTGGTAGAAATTGCT-3'  | 5'-ACGCCACTTCCTTGCTCTTC-3'     |
| <i>Srebf1</i> | 5'-AACGTCACCTCCAGCTAGAC-3'     | 5'-CCACTAAGGTGCCTACAGAGC-3'    |
| <i>Fasn</i>   | 5'-TTCCAAGACGAAAATGATGC-3'     | 5'-AATTGTGGGATCAGGAGAGC-3'     |
| <i>Gapdh</i>  | 5'-TGTGTCCGTCGTGGATCTGA-3'     | 5'-TTGCTGTTGAAGTCGCAGGAG-3'    |
